# Supplementary material
Source: Springer Nature journal article supplement (https://www.springermedizin.de/resource/supplementary/12990_2014_638_MOESM4_ESM.pdf/9612274)

# Anxiety-like behaviour

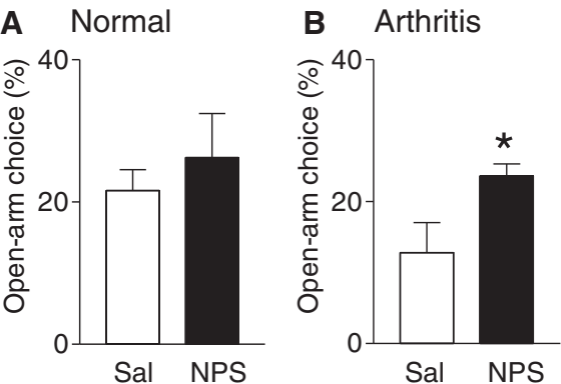

# Locomotor activity

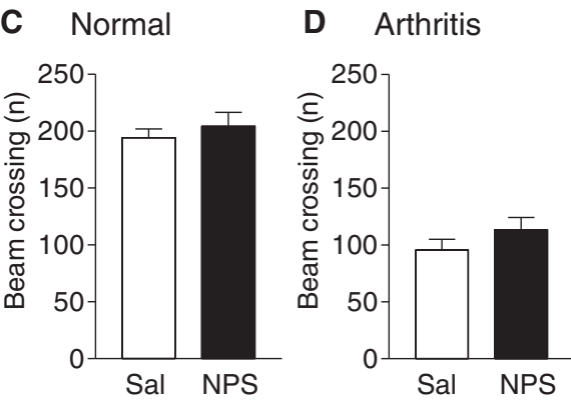

Supplement: MOESM4 [file 9612274]
